# Supplementary material for: Suppression of charge carrier recombination in a Ta3N5 photoanode via defect regulation: a theoretical investigation
Source: Royal Society of Chemistry journal article supplement (doi:10.1039/d4ta01693a), 2024-01-01
Supplement: d4ta01693a1.pdf [file d4ta01693a1.pdf]

## Supporting Information

### Suppression of Charge Carrier Recombination in Ta<sub>3</sub>N<sub>5</sub> Photoanode via Defect Regulation

Guozheng Fan<sup>ab</sup>, Zhaobo Zhou<sup>\*bc</sup>, Yu Jing<sup>\*a</sup>, and Thomas Frauenheim<sup>de</sup>

a. Jiangsu Co-Innovation Centre of Efficient Processing and Utilization of Forest Resources, College of Chemical Engineering, Nanjing Forestry University, Nanjing 210037, China. E-mail: yujing@njfu.edu.cn.

b. Bremen Center for Computational Materials Science, University of Bremen, 28359 Bremen, Germany.

c. Department of Physical and Macromolecular Chemistry, Faculty of Science, Charles University in Prague, Prague 12843, Czech Republic. E-mail: zhaoboz@natur.cuni.cz.

d. School of Science, Constructor University, Bremen 28759, Germany.

e. Institute for Advanced Study, Chengdu University, Chengdu 610106, China.

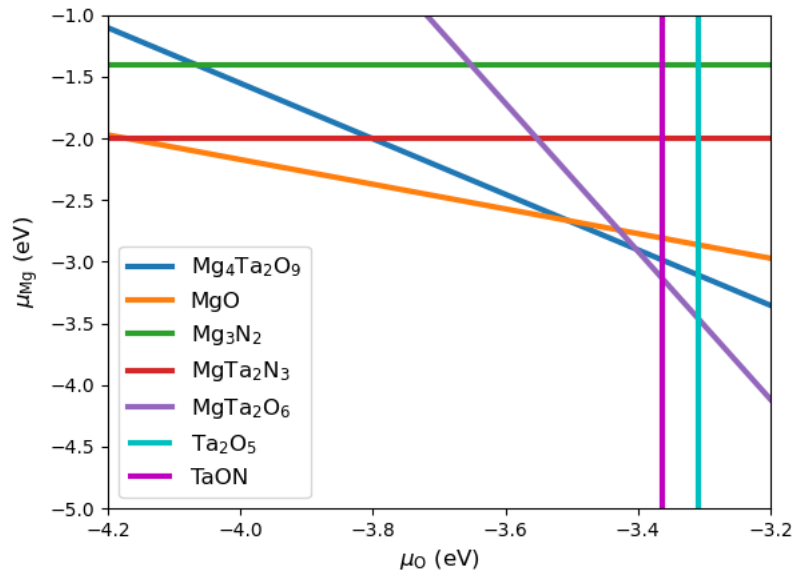

Figure S1: Chemical potentials of Mg and O co-doped  $\text{Ta}_3\text{N}_5$  system under N-rich region.

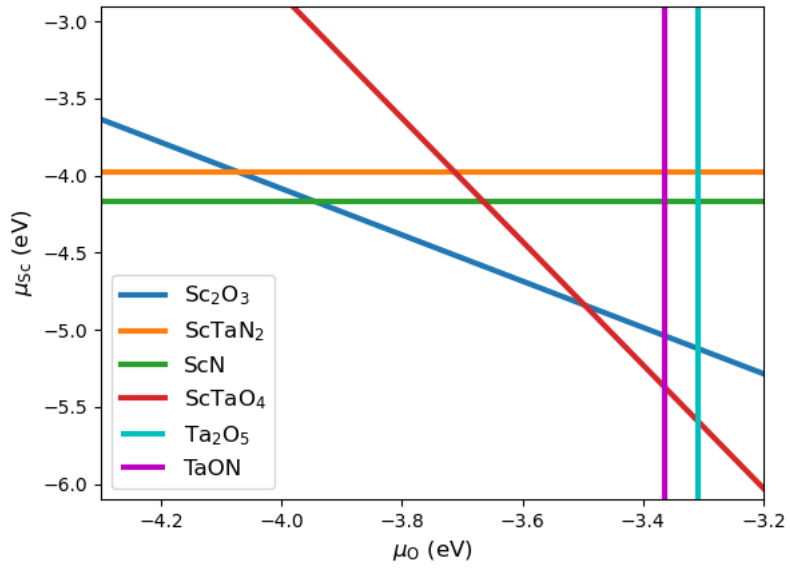

Figure S2: Chemical potentials of Sc and O co-doped Ta<sub>3</sub>N<sub>5</sub> system under N-rich region.

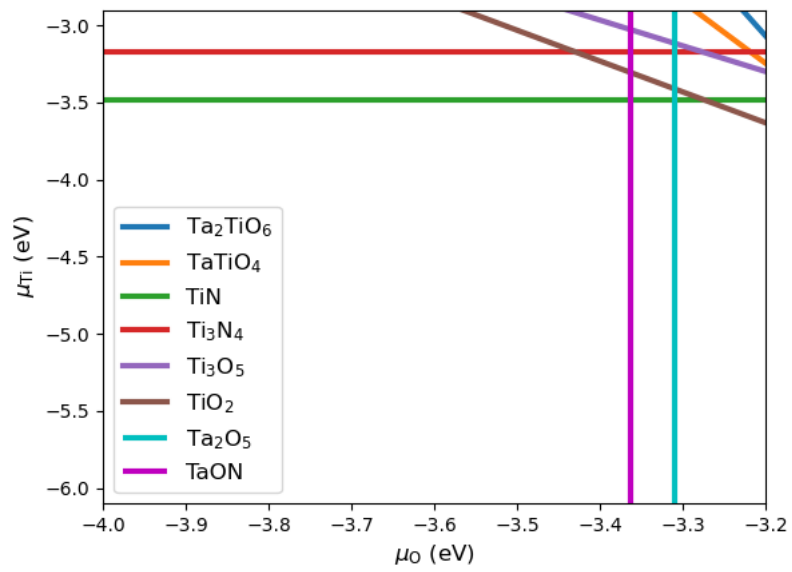

Figure S3: Chemical potentials of Ti and O co-doped Ta<sub>3</sub>N<sub>5</sub> system under N-rich region.

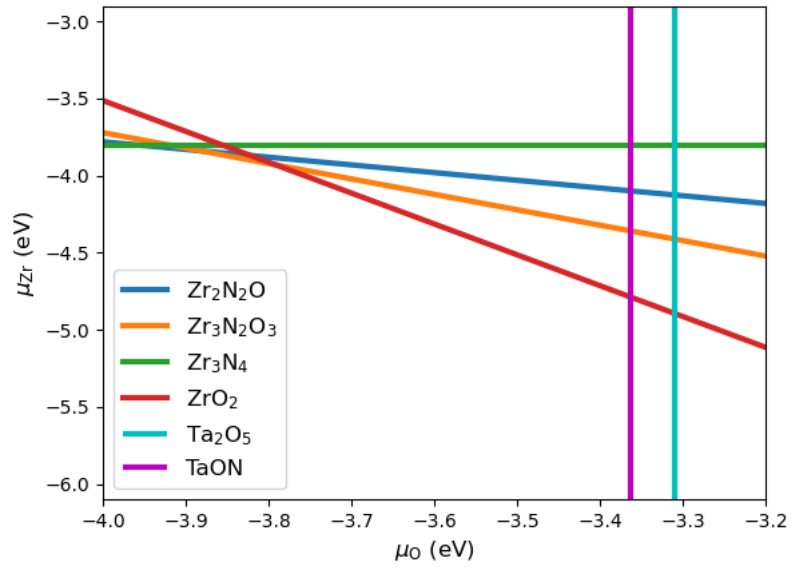

Figure S4: Chemical potentials of Zr and O co-doped  $\text{Ta}_3\text{N}_5$  system under N-rich region.

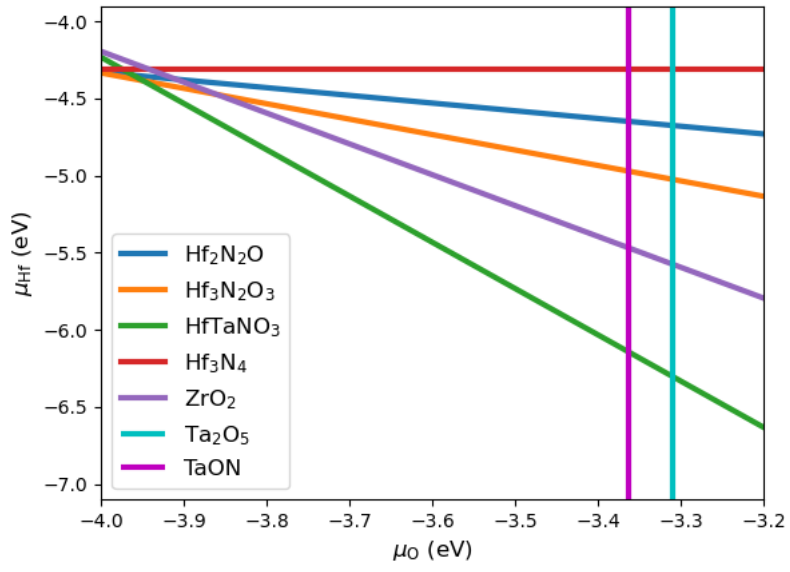

Figure S5: Chemical potentials of Hf and O co-doped  $\text{Ta}_3\text{N}_5$  system under N-rich region.

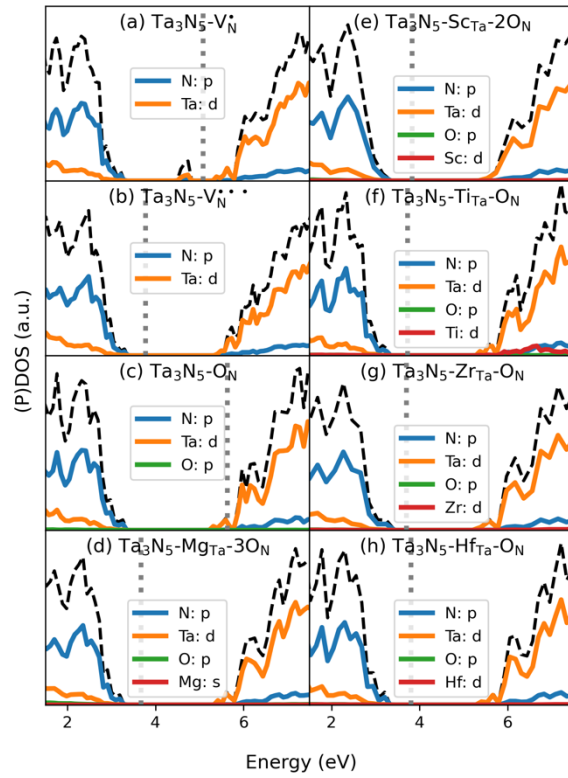

Figure S6: (P)DOS of (a)  $\text{Ta}_3\text{N}_5\text{-V}_\text{N}$ , (b)  $\text{Ta}_3\text{N}_5\text{-V}_\text{N}$ , (c)  $\text{Ta}_3\text{N}_5\text{-O}_\text{N}$ , (d)  $\text{Ta}_3\text{N}_5\text{-Mg}_{\text{Ta}}\text{-3O}_\text{N}$ , (e)  $\text{Ta}_3\text{N}_5\text{-Sc}_{\text{Ta}}\text{-2O}_\text{N}$ , (f)  $\text{Ta}_3\text{N}_5\text{-Ti}_{\text{Ta}}\text{-O}_\text{N}$ , (g)  $\text{Ta}_3\text{N}_5\text{-Zr}_{\text{Ta}}\text{-O}_\text{N}$ , and (h)  $\text{Ta}_3\text{N}_5\text{-Hf}_{\text{Ta}}\text{-O}_\text{N}$ . The vertical gray line is the Fermi energy (eV) and the dashed black line is the total DOS.

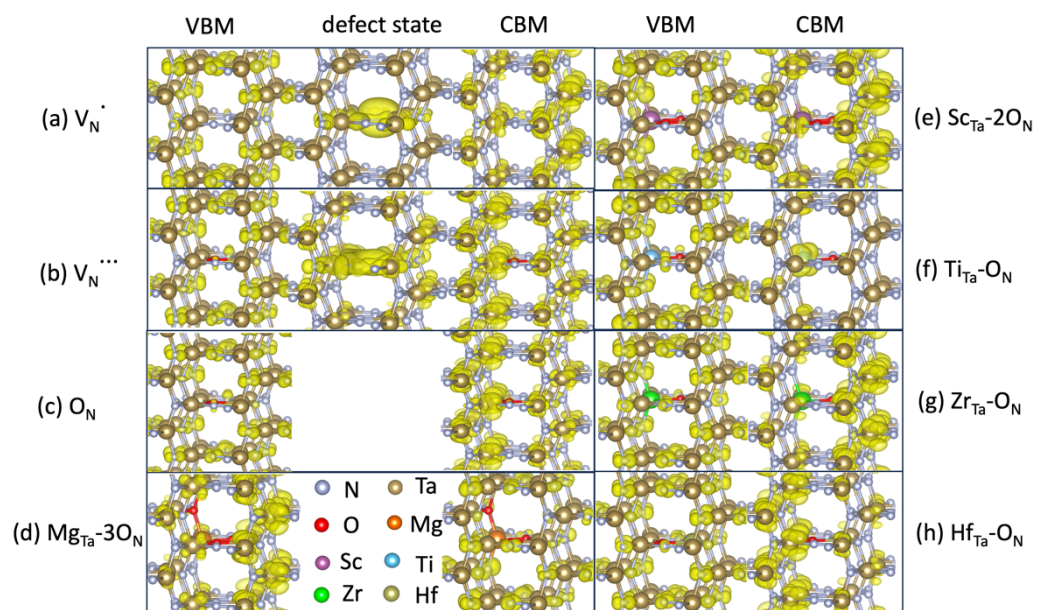

Figure S7: Partial electron densities of (a)  $\text{Ta}_3\text{N}_5\text{-V}_N^{\cdot}$ , (b)  $\text{Ta}_3\text{N}_5\text{-V}_N^{\bullet\bullet\bullet}$ , (c)  $\text{Ta}_3\text{N}_5\text{-O}_N$ , (d)  $\text{Ta}_3\text{N}_5\text{-Mg}_{\text{Ta}}\text{-3O}_N$ , (e)  $\text{Ta}_3\text{N}_5\text{-Sc}_{\text{Ta}}\text{-2O}_N$ , (f)  $\text{Ta}_3\text{N}_5\text{-Ti}_{\text{Ta}}\text{-O}_N$ , (g)  $\text{Ta}_3\text{N}_5\text{-Zr}_{\text{Ta}}\text{-O}_N$ , and (h)  $\text{Ta}_3\text{N}_5\text{-Hf}_{\text{Ta}}\text{-O}_N$ .



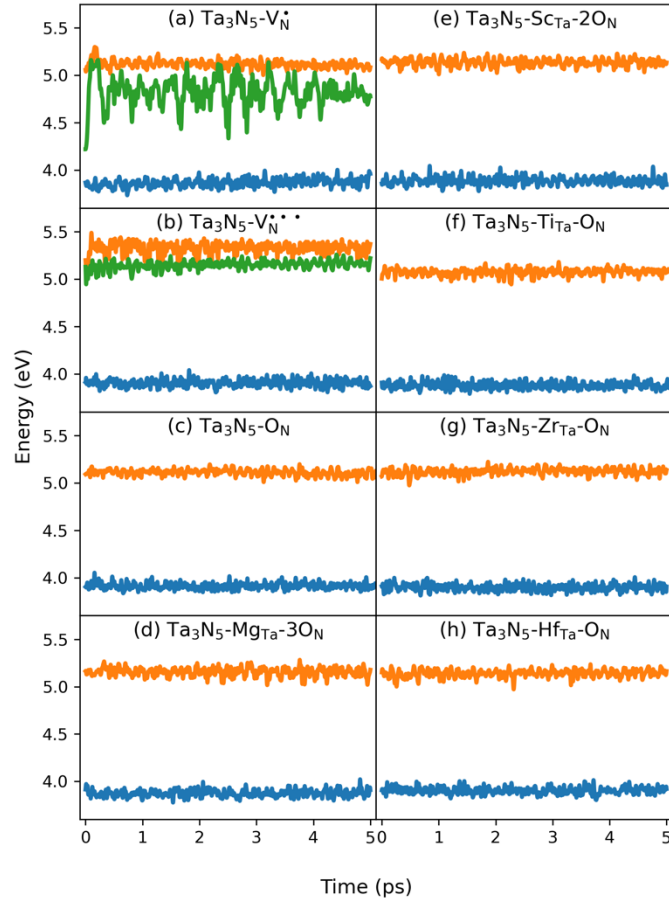

Figure S8: Time evolution of the VBM, CBM and the defect state of (a)  $\text{Ta}_3\text{N}_5\text{-V}_\text{N}^{\text{I}}$ , (b)  $\text{Ta}_3\text{N}_5\text{-V}_\text{N}^{\text{II}}$ , (c)  $\text{Ta}_3\text{N}_5\text{-O}_\text{N}$ , (d)  $\text{Ta}_3\text{N}_5\text{-Mg}_{\text{Ta}}\text{-3O}_\text{N}$ , (e)  $\text{Ta}_3\text{N}_5\text{-Sc}_{\text{Ta}}\text{-2O}_\text{N}$ , and (f)  $\text{Ta}_3\text{N}_5\text{-Ti}_{\text{Ta}}\text{-O}_\text{N}$ , (g)  $\text{Ta}_3\text{N}_5\text{-Zr}_{\text{Ta}}\text{-O}_\text{N}$ , and (h)  $\text{Ta}_3\text{N}_5\text{-Hf}_{\text{Ta}}\text{-O}_\text{N}$ . The green lines are the energies of the defect level.

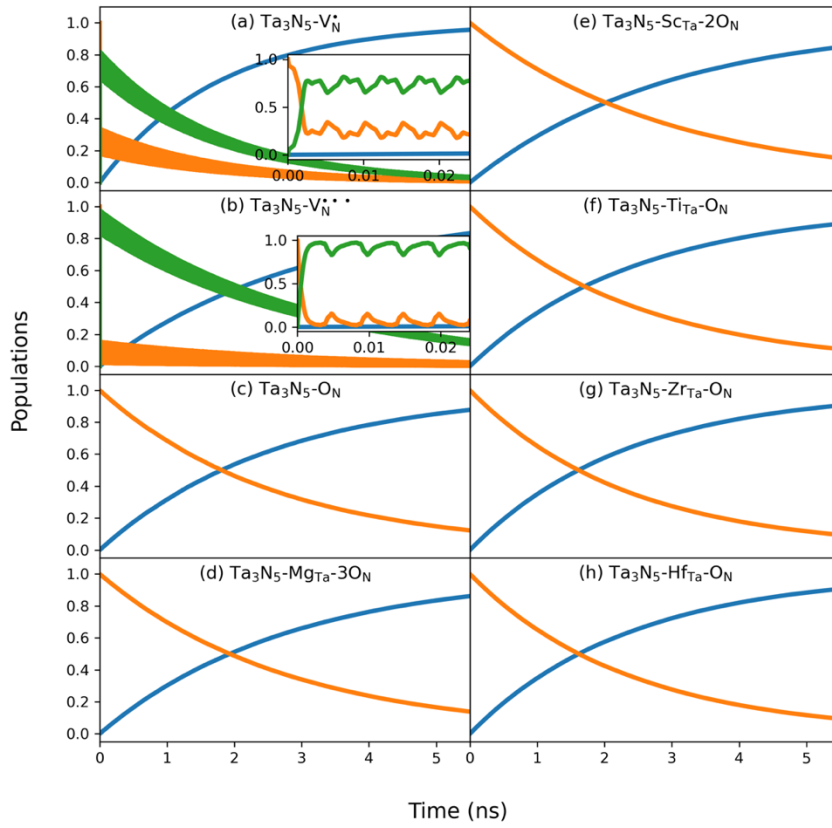

Figure S9: Time-dependent state population evolutions of (a) Ta<sub>3</sub>N<sub>5</sub>-V<sub>N</sub><sup>\*</sup>, (b) Ta<sub>3</sub>N<sub>5</sub>-V<sub>N</sub><sup>\*\*</sup>, (c) Ta<sub>3</sub>N<sub>5</sub>-O<sub>N</sub>, (d) Ta<sub>3</sub>N<sub>5</sub>-Mg<sub>Ta</sub>-3O<sub>N</sub>, (e) Ta<sub>3</sub>N<sub>5</sub>-Sc<sub>Ta</sub>-2O<sub>N</sub>, (f) Ta<sub>3</sub>N<sub>5</sub>-Ti<sub>Ta</sub>-O<sub>N</sub>, (g) Ta<sub>3</sub>N<sub>5</sub>-Zr<sub>Ta</sub>-O<sub>N</sub>, and (h) Ta<sub>3</sub>N<sub>5</sub>-Hf<sub>Ta</sub>-O<sub>N</sub>. The blue lines are VBM populations, while the orange lines and green lines are those of CBM and defect state, respectively.

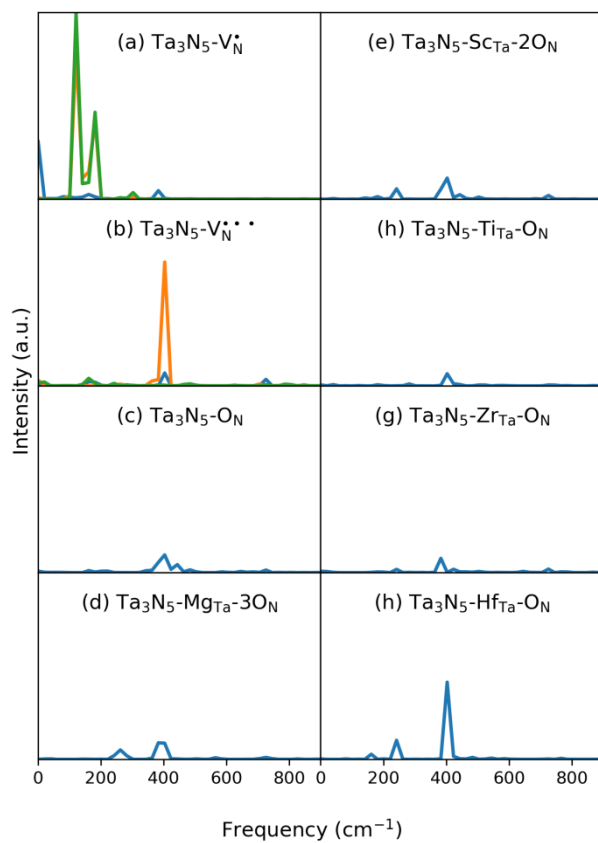

Figure S10: FT spectra of autocorrelation functions of the time evolution at 300K of (a)  $\text{Ta}_3\text{N}_5\text{-V}_\text{N}$ , (b)  $\text{Ta}_3\text{N}_5\text{-V}_\text{N}''$ , (c)  $\text{Ta}_3\text{N}_5\text{-O}_\text{N}$ , (d)  $\text{Ta}_3\text{N}_5\text{-Mg}_{\text{Ta}}\text{-3O}_\text{N}$ , (e)  $\text{Ta}_3\text{N}_5\text{-Sc}_{\text{Ta}}\text{-2O}_\text{N}$ , (f)  $\text{Ta}_3\text{N}_5\text{-Ti}_{\text{Ta}}\text{-O}_\text{N}$ , (g)  $\text{Ta}_3\text{N}_5\text{-Zr}_{\text{Ta}}\text{-O}_\text{N}$ , and (h)  $\text{Ta}_3\text{N}_5\text{-Hf}_{\text{Ta}}\text{-O}_\text{N}$ .

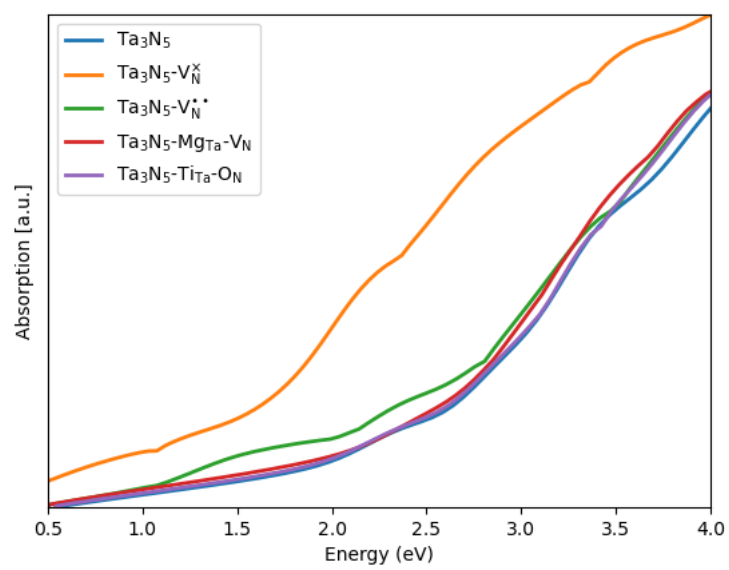

Figure S11: Light absorption coefficients of Ta<sub>3</sub>N<sub>5</sub>, Ta<sub>3</sub>N<sub>5</sub>-V<sub>N</sub><sup>x</sup>, Ta<sub>3</sub>N<sub>5</sub>-V<sub>N</sub><sup>\*</sup>, Ta<sub>3</sub>N<sub>5</sub>-Mg<sub>Ta</sub>-V<sub>N</sub><sup>x</sup>, and Ta<sub>3</sub>N<sub>5</sub>-Ti<sub>Ta</sub>-O<sub>N</sub> systems.

Table S1: e-h recombination time, NACs, dephasing time, and Bader charges of Ta atoms in Figure 1(c) of Ta<sub>3</sub>N<sub>5</sub> with doping metal and oxygen atoms. The transition state is CBM to VBM.

|                                                                   | e-h recombination time (ns) | NACs (meV) | Dephasing time (fs) | Bader charge of Ta <sup>1</sup> | Bader charge of Ta <sup>2</sup> | Bader charge of Ta <sup>3</sup> |
|-------------------------------------------------------------------|-----------------------------|------------|---------------------|---------------------------------|---------------------------------|---------------------------------|
| Ta <sub>3</sub> N <sub>5</sub> -V <sub>N</sub> <sup>i</sup>       | 1.75                        | 1.22       | 11.33               | 2.14                            | 2.10                            | 2.34                            |
| Ta <sub>3</sub> N <sub>5</sub> -V <sub>N</sub> <sup>ii</sup>      | 3.07                        | 0.84       | 10.5                | 2.42                            | 2.37                            | 2.40                            |
| Ta <sub>3</sub> N <sub>5</sub> -O <sub>N</sub>                    | 2.62                        | 1.34       | 17.35               | 2.46                            | 2.46                            | 2.48                            |
| Ta <sub>3</sub> N <sub>5</sub> -Mg <sub>Ta</sub> -3O <sub>N</sub> | 2.78                        | 1.35       | 12.51               | 2.46                            | 2.47                            | 2.49                            |
| Ta <sub>3</sub> N <sub>5</sub> -Sc <sub>Ta</sub> -2O <sub>N</sub> | 2.41                        | 1.33       | 13.09               | 2.47                            | 2.48                            | 2.49                            |
| Ta <sub>3</sub> N <sub>5</sub> -Ti <sub>Ta</sub> -O <sub>N</sub>  | 2.46                        | 1.35       | 16.78               | 2.47                            | 2.47                            | 2.48                            |
| Ta <sub>3</sub> N <sub>5</sub> -Zr <sub>Ta</sub> -O <sub>N</sub>  | 2.33                        | 1.39       | 15.96               | 2.46                            | 2.47                            | 2.49                            |
| Ta <sub>3</sub> N <sub>5</sub> -Hf <sub>Ta</sub> -O <sub>N</sub>  | 2.33                        | 1.36       | 14.02               | 2.46                            | 2.47                            | 2.49                            |

Table S2: Bader charges of N atoms in Figure 1(c) and NACs of Ta<sub>3</sub>N<sub>5</sub> systems with doping metal and N vacancies (different charge states). The first transition state with superscript 1 is between VBM and the defect state, and superscript 2 is between the defect state and CBM. The superscripts of N are consistent with the labels in Figure 1.

|                                                                               | Bader charge of N <sup>1</sup> | Bader charge of N <sup>2</sup> | Bader charge of N <sup>3</sup> | Bader charge of N <sup>4</sup> |
|-------------------------------------------------------------------------------|--------------------------------|--------------------------------|--------------------------------|--------------------------------|
| Ta <sub>3</sub> N <sub>5</sub>                                                | 1.40                           | 1.40                           | 1.53                           | 1.55                           |
| Ta <sub>3</sub> N <sub>5</sub> -V <sub>N</sub> <sup>x</sup>                   | 1.45                           | 1.45                           | 1.59                           | 1.55                           |
| Ta <sub>3</sub> N <sub>5</sub> -V <sub>N</sub> <sup>..</sup>                  | 1.46                           | 1.44                           | 1.59                           | 1.56                           |
| Ta <sub>3</sub> N <sub>5</sub> -Mg <sub>Ta</sub> -V <sub>N</sub> <sup>x</sup> | 1.48                           | 1.48                           | 1.56                           | 1.55                           |
